# Supplementary material for: COVID-19 and Changes in the Model of Physical Fitness and Body Composition of Young Tennis Players
Source: MDPI journal article supplement (doi:10.3390/app131810015), 2023-09-05
Supplement: s1 [file s1]

## Supplementary tables

Supplementary Table S1: The estimated contrasts (Estimate), 95% confidence intervals (CI), and *p*-values for the differences between the age-adjusted effects in 2020 and 2021 and the age-adjusted predicted effects in 2020 and 2021 by sex and (square-root transformed) outcome.

|                                   | sex    | year | Estimate | 95% CI         | <i>p</i> -value |
|-----------------------------------|--------|------|----------|----------------|-----------------|
| Direct comparison (DC)            | MALE   | 2020 | -2,35    | -4,33- -0,37   | 0,018           |
|                                   |        | 2021 | -3,66    | -6,80- -0,53   | 0,020           |
|                                   | FEMALE | 2020 | -0,25    | -2,25-1,96     | 0,942           |
|                                   |        | 2021 | -1,29    | -4,40-1,82     | 0,508           |
| Pre-stretch Augmentation (PSA)    | MALE   | 2020 | -10,21   | -18,37- -2,05  | 0,012           |
|                                   |        | 2021 | -16,54   | -29,46 - -3,62 | 0,010           |
|                                   | FEMALE | 2020 | -1,01    | -10,08-8,05    | 0,943           |
|                                   | MALE   | 2021 | -5,44    | -18,18-7,30    | 0,492           |
| Eccentric Utilization Ratio (EUR) | MALE   | 2020 | -0,10    | -0,18- -0,02   | 0,012           |
|                                   |        | 2021 | -0,17    | -0,30- -0,04   | 0,010           |
|                                   | FEMALE | 2020 | -0,01    | -0,10-0,08     | 0,945           |
|                                   | MALE   | 2021 | -0,05    | -0,18-0,07     | 0,499           |

Supplementary Table S2: Estimated coefficients, standard errors (SE), p-values, partial eta<sup>2</sup>, and Cohen's d. Direct comparison (DC). GoF statistics M: p<sub>age</sub>=0,52, p<sub>year</sub>=0,84, p<sub>fixed</sub>=0,56, p<sub>random</sub>=0,28; F: p<sub>age</sub>=0,04, p<sub>year</sub>=0,94, p<sub>fixed</sub>=0,82, p<sub>random</sub>=0,51. AIC<sub>males</sub>=2796, AIC<sub>females</sub>=2008; BIC<sub>males</sub>=2855, BIC<sub>females</sub>=2059. N<sub>males</sub>=198, n<sub>males</sub>=384, N<sub>females</sub>=140, n<sub>females</sub>=274.

|   | Variable         | Estimate | SE   | p-value | pEta <sup>2</sup> | d     |
|---|------------------|----------|------|---------|-------------------|-------|
| M | (Intercept)      | 0,04     | 0,81 | 0,964   | <0,001            | 0,01  |
|   | Age1             | 1,47     | 0,93 | 0,116   | 0,01              | 0,24  |
|   | Age2             | -1,44    | 0,96 | 0,136   | 0,01              | -0,23 |
|   | Age3             | 3,04     | 1,22 | 0,013   | 0,03              | 0,38  |
|   | Age4             | 0,07     | 1,31 | 0,957   | <0,001            | 0,01  |
|   | Period2019vs2020 | 0,74     | 0,51 | 0,151   | 0,01              | 0,22  |
|   | Period2021vs2020 | 0,30     | 0,52 | 0,569   | 0,00              | 0,09  |
|   | year_diference1  | 1,00     | 0,61 | 0,103   | 0,02              | 0,25  |
|   | year_diference2  | -1,12    | 0,52 | 0,033   | 0,03              | -0,32 |
|   | year_diference3  | -0,98    | 0,78 | 0,212   | 0,01              | -0,19 |
|   | year_diference4  | 0,72     | 0,41 | 0,081   | 0,02              | 0,26  |
| F | (Intercept)      | 0,83     | 0,93 | 0,372   | 0,01              | 0,15  |
|   | Age1             | 2,03     | 1,06 | 0,058   | 0,03              | 0,34  |
|   | Age2             | 0,30     | 1,12 | 0,791   | 0,00              | 0,05  |
|   | Age3             | 3,35     | 1,34 | 0,014   | 0,05              | 0,45  |
|   | Age4             | 0,91     | 1,28 | 0,478   | 0,00              | 0,13  |
|   | Period2019vs2020 | -0,23    | 0,68 | 0,738   | 0,00              | -0,06 |
|   | Period2021vs2020 | -0,57    | 0,68 | 0,405   | 0,01              | -0,15 |
|   | year_diference1  | -1,29    | 0,67 | 0,057   | 0,03              | -0,34 |
|   | year_diference2  | -1,79    | 0,94 | 0,060   | 0,03              | -0,34 |
|   | year_diference3  | -0,27    | 0,47 | 0,561   | 0,00              | -0,10 |

Supplementary Table S3: Estimated coefficients, standard errors (SE), p-values, partial eta<sup>2</sup>, and Cohen's d. Pre-stretch Augmentation (PSA). GoF statistics M:  $p_{\text{age}}=0,50$ ,  $p_{\text{year}}=0,87$ ,  $p_{\text{fixed}}=0,10$ ,  $p_{\text{random}}=0,12$ ; F:  $p_{\text{age}}=0,74$ ,  $p_{\text{year}}=0,24$ ,  $p_{\text{fixed}}=0,37$ ,  $p_{\text{random}}=0,03$ .  $\text{AIC}_{\text{males}}=1764$ ,  $\text{AIC}_{\text{females}}=1143$ ;  $\text{BIC}_{\text{males}}=1815$ ,  $\text{BIC}_{\text{females}}=1193$ .  $N_{\text{males}}=198$ ,  $n_{\text{males}}=384$ ,  $N_{\text{females}}=140$ ,  $n_{\text{females}}=274$ .

|   | Variable         | Estimate | SE   | p-value | pEta <sup>2</sup> | d     |
|---|------------------|----------|------|---------|-------------------|-------|
| M | (Intercept)      | 0,25     | 3,49 | 0,943   | <0,001            | 0,01  |
|   | Age1             | 6,90     | 4,05 | 0,090   | 0,02              | 0,26  |
|   | Age2             | -6,16    | 4,07 | 0,133   | 0,01              | -0,23 |
|   | Age3             | 10,86    | 5,22 | 0,039   | 0,02              | 0,31  |
|   | Age4             | -2,62    | 5,70 | 0,646   | 0,00              | -0,07 |
|   | Period2019vs2020 | 3,20     | 2,11 | 0,132   | 0,01              | 0,23  |
|   | Period2021vs2020 | 0,68     | 2,15 | 0,753   | 0,00              | 0,05  |
|   | year_diference1  | 4,41     | 2,52 | 0,082   | 0,02              | 0,26  |
|   | year_diference2  | -4,76    | 2,17 | 0,030   | 0,03              | -0,33 |
|   | year_diference3  | -3,96    | 3,25 | 0,225   | 0,01              | -0,18 |
|   | year_diference4  | 3,22     | 1,73 | 0,064   | 0,02              | 0,28  |
| F | (Intercept)      | 3,85     | 3,94 | 0,331   | 0,01              | 0,17  |
|   | Age1             | 7,90     | 4,52 | 0,083   | 0,02              | 0,31  |
|   | Age2             | 0,71     | 4,72 | 0,881   | 0,00              | 0,03  |
|   | Age3             | 11,94    | 5,62 | 0,036   | 0,03              | 0,38  |
|   | Age4             | 3,08     | 5,49 | 0,575   | 0,00              | 0,10  |
|   | Period2019vs2020 | -0,93    | 2,80 | 0,741   | 0,00              | -0,06 |
|   | Period2021vs2020 | -2,48    | 2,81 | 0,379   | 0,01              | -0,16 |
|   | year_diference1  | -4,62    | 2,79 | 0,100   | 0,02              | -0,30 |
|   | year_diference2  | -6,35    | 3,91 | 0,107   | 0,02              | -0,29 |
|   | year_diference3  | -0,57    | 1,96 | 0,774   | 0,00              | -0,05 |

Supplementary Table S4: Estimated coefficients, standard errors (SE), p-values, partial eta<sup>2</sup>, and Cohen's d. Eccentric Utilization Ratio (EUR). GoF statistics M:  $p_{\text{age}}=0,02$ ,  $p_{\text{year}}=0,88$ ,  $p_{\text{fixed}}=0,10$ ,  $p_{\text{random}}=0,11$ ; F:  $p_{\text{age}}=0,04$ ,  $p_{\text{year}}=0,93$ ,  $p_{\text{fixed}}=0,83$ ,  $p_{\text{random}}=0,60$ .  $\text{AIC}_{\text{males}}=639$ ,  $\text{AIC}_{\text{females}}=423$ ;  $\text{BIC}_{\text{males}}=580$ ,  $\text{BIC}_{\text{females}}=373$ .  $N_{\text{males}}=198$ ,  $n_{\text{males}}=384$ ,  $N_{\text{females}}=140$ ,  $n_{\text{females}}=274$ .

|   | Variable         | Estimate | SE   | p-value | pEta <sup>2</sup> | d     |
|---|------------------|----------|------|---------|-------------------|-------|
| M | (Intercept)      | 1,00     | 0,03 | <0,001  | 0,81              | 4,09  |
|   | Age1             | 0,07     | 0,04 | 0,090   | 0,02              | 0,26  |
|   | Age2             | -0,06    | 0,04 | 0,132   | 0,01              | -0,23 |
|   | Age3             | 0,11     | 0,05 | 0,039   | 0,02              | 0,31  |
|   | Age4             | -0,03    | 0,06 | 0,647   | 0,00              | -0,07 |
|   | Period2019vs2020 | 0,03     | 0,02 | 0,130   | 0,01              | 0,23  |
|   | Period2021vs2020 | 0,01     | 0,02 | 0,751   | 0,00              | 0,05  |
|   | year_diference1  | 0,04     | 0,03 | 0,082   | 0,02              | 0,26  |
|   | year_diference2  | -0,05    | 0,02 | 0,030   | 0,03              | -0,33 |
|   | year_diference3  | -0,04    | 0,03 | 0,224   | 0,01              | -0,18 |
|   | year_diference4  | 0,03     | 0,02 | 0,063   | 0,02              | 0,28  |
| F | (Intercept)      | 1,04     | 0,04 | <0,001  | 0,83              | 4,46  |
|   | Age1             | 0,08     | 0,05 | 0,083   | 0,02              | 0,31  |
|   | Age2             | 0,01     | 0,05 | 0,881   | 0,00              | 0,03  |
|   | Age3             | 0,12     | 0,06 | 0,035   | 0,04              | 0,38  |
|   | Age4             | 0,03     | 0,05 | 0,573   | 0,00              | 0,10  |
|   | Period2019vs2020 | -0,01    | 0,03 | 0,738   | 0,00              | -0,06 |
|   | Period2021vs2020 | -0,02    | 0,03 | 0,384   | 0,01              | -0,16 |
|   | year_diference1  | -0,05    | 0,03 | 0,100   | 0,02              | -0,30 |
|   | year_diference2  | -0,06    | 0,04 | 0,107   | 0,02              | -0,29 |
|   | year_diference3  | -0,01    | 0,02 | 0,762   | 0,00              | -0,05 |

Supplementary Table S5: The estimated contrasts (Estimate), 95% confidence intervals (CI), and *p*-values for the differences between the age-adjusted effects in 2020 and 2021 and the age-adjusted predicted effects in 2020 and 2021 by sex and (square-root transformed) outcome.

|                                       | sex    | year | Estimate | 95% CI       | <i>p</i> -value |
|---------------------------------------|--------|------|----------|--------------|-----------------|
| Body fat mass (BFAT)                  | MALE   | 2020 | 0,68     | 0,44-0,92    | <0,001          |
|                                       |        | 2021 | 1,08     | 0,72-1,43    | <0,001          |
|                                       | FEMALE | 2020 | 0,07     | -0,24-0,37   | 0,810           |
|                                       |        | 2021 | 0,06     | -0,36-0,47   | 0,920           |
| Body muscle mass (BMUSC)              | MALE   | 2020 | -0,22    | -0,34- -0,10 | <0,001          |
|                                       |        | 2021 | -0,28    | -0,46- -0,10 | 0,001           |
|                                       | FEMALE | 2020 | -0,01    | -0,15-0,13   | 0,971           |
|                                       |        | 2021 | 0,07     | -0,11-0,25   | 0,585           |
| Overhead medicine ball throw (OMBT)   | MALE   | 2020 | -0,54    | -1,75-0,67   | 0,463           |
|                                       |        | 2021 | -1,08    | -2,89-0,73   | 0,290           |
|                                       | FEMALE | 2020 | -0,65    | -2,10-0,80   | 0,467           |
|                                       |        | 2021 | -0,85    | -2,83-1,13   | 0,494           |
| 20 meters shuttle run test (BEEPVO2M) | MALE   | 2020 | -0,01    | -0,18-0,15   | 0,963           |
|                                       |        | 2021 | -0,05    | -0,30-0,19   | 0,806           |
|                                       | FEMALE | 2020 | -0,13    | -0,33-0,08   | 0,266           |
|                                       |        | 2021 | -0,25    | -0,52-0,02   | 0,073           |
| Countermovement jump height (CJM)     | MALE   | 2020 | 0,09     | -0,12-0,29   | 0,495           |
|                                       |        | 2021 | 0,16     | -0,15-0,46   | 0,369           |
|                                       | FEMALE | 2020 | -0,06    | -0,31-0,19   | 0,780           |
|                                       |        | 2021 | -0,12    | -0,45-0,22   | 0,610           |
| Squat jump height (SJ)                | MALE   | 2020 | 0,19     | 0,00-0,38    | 0,050           |
|                                       |        | 2021 | 0,35     | 0,06-0,63    | 0,014           |
|                                       | FEMALE | 2020 | -0,02    | -0,23-0,18   | 0,937           |
|                                       |        | 2021 | 0,09     | -0,20-0,37   | 0,684           |

Supplementary Table S6: Estimated coefficients, standard errors (SE), p-values, partial eta<sup>2</sup>, and Cohen's d. OMBT. GoF statistics M: p<sub>age</sub>=0,30, p<sub>year</sub>=0,51, p<sub>fixed</sub>=0,60, p<sub>random</sub>=0,07; F: p<sub>age</sub>=0,74, p<sub>year</sub>=0,24, p<sub>fixed</sub>=0,37, p<sub>random</sub>=0,03. AIC<sub>males</sub>=1764, AIC<sub>females</sub>=1143; BIC<sub>males</sub>=1815, BIC<sub>females</sub>=1193. N<sub>males</sub>=341, n<sub>males</sub>=401, N<sub>females</sub>=278, n<sub>females</sub>=341.

|   | Variable         | Estimate | SE   | p-value | pEta <sup>2</sup> | d    |
|---|------------------|----------|------|---------|-------------------|------|
| M | (Intercept)      | 24,63    | 0,61 | <0,001  | 0,89              | 5,72 |
|   | Age1             | 2,79     | 1,19 | 0,020   | 0,03              | 0,34 |
|   | Age2             | 12,98    | 1,08 | <0,001  | 0,43              | 1,73 |
|   | Age3             | 14,98    | 1,37 | <0,001  | 0,38              | 1,58 |
|   | Period2019vs2020 | 0,05     | 0,37 | 0,887   | 0,00              | 0,02 |
|   | Period2021vs2020 | -0,05    | 0,41 | 0,910   | 0,00              | 0,02 |
|   | year_diference1  | -1,92    | 0,41 | <0,001  | 0,10              | 0,67 |
|   | year_diference2  | -3,21    | 0,60 | <0,001  | 0,13              | 0,77 |
|   | year_diference3  | -0,55    | 0,33 | 0,100   | 0,01              | 0,24 |
| F | (Intercept)      | 22,62    | 0,64 | <0,001  | 0,90              | 5,93 |
|   | Age1             | 0,45     | 0,72 | 0,538   | 0,00              | 0,11 |
|   | Age2             | 7,93     | 0,79 | <0,001  | 0,44              | 1,77 |
|   | Age3             | 8,06     | 1,03 | <0,001  | 0,32              | 1,38 |
|   | Age4             | 8,58     | 1,12 | <0,001  | 0,31              | 1,35 |
|   | Period2019vs2020 | 0,14     | 0,47 | 0,769   | 0,00              | 0,05 |
|   | Period2021vs2020 | 0,31     | 0,47 | 0,508   | 0,00              | 0,12 |
|   | year_diference1  | -0,91    | 0,46 | 0,050   | 0,03              | 0,35 |
|   | year_diference2  | -1,52    | 0,67 | 0,025   | 0,04              | 0,40 |
|   | year_diference3  | 0,23     | 0,35 | 0,509   | 0,00              | 0,12 |

Supplementary Table S7: Estimated coefficients, standard errors (SE), p-values, partial eta<sup>2</sup>, and Cohen's d. CMJ. GoF statistics M: p<sub>age</sub>=0,23, p<sub>year</sub>=0,53, p<sub>fixed</sub>=0,17, p<sub>random</sub>=0,96; F: p<sub>age</sub>=0,35, p<sub>year</sub>=0,38, p<sub>fixed</sub>=0,55, p<sub>random</sub>=0,27. AIC<sub>males</sub>=309, AIC<sub>females</sub>=202; BIC<sub>males</sub>=364, BIC<sub>females</sub>=249. N<sub>males</sub>=198, n<sub>males</sub>=386, N<sub>females</sub>=140, n<sub>females</sub>=275.

|   | Variable         | Estimate | SE   | p-value | pEta <sup>2</sup> | d    |
|---|------------------|----------|------|---------|-------------------|------|
| M | (Intercept)      | 4,89     | 0,10 | <0,001  | 0,92              | 6,76 |
|   | Age1             | 0,19     | 0,12 | 0,121   | 0,01              | 0,23 |
|   | Age2             | -0,03    | 0,13 | 0,799   | 0,00              | 0,04 |
|   | Age3             | 1,37     | 0,18 | <0,001  | 0,25              | 1,17 |
|   | Age4             | 1,19     | 0,20 | <0,001  | 0,16              | 0,87 |
|   | Period2019vs2020 | -0,07    | 0,06 | 0,249   | 0,01              | 0,17 |
|   | Period2021vs2020 | 0,06     | 0,07 | 0,378   | 0,00              | 0,13 |
|   | year_diference1  | -0,10    | 0,07 | 0,157   | 0,01              | 0,21 |
|   | year_diference2  | -0,21    | 0,10 | 0,032   | 0,03              | 0,32 |
|   | year_diference3  | -0,08    | 0,05 | 0,145   | 0,01              | 0,22 |
| F | (Intercept)      | 4,88     | 0,11 | <0,001  | 0,94              | 7,78 |
|   | Age1             | 0,55     | 0,19 | 0,005   | 0,06              | 0,51 |
|   | Age2             | 0,47     | 0,16 | 0,005   | 0,06              | 0,51 |
|   | Age3             | 0,60     | 0,19 | 0,002   | 0,08              | 0,57 |
|   | Period2019vs2020 | -0,03    | 0,08 | 0,749   | 0,00              | 0,06 |
|   | Period2021vs2020 | 0,03     | 0,08 | 0,717   | 0,00              | 0,06 |
|   | year_diference1  | -0,33    | 0,08 | <0,001  | 0,13              | 0,76 |
|   | year_diference2  | -0,32    | 0,11 | 0,005   | 0,06              | 0,50 |
|   | year_diference3  | -0,18    | 0,06 | 0,003   | 0,07              | 0,54 |

Supplementary Table S8: Estimated coefficients, standard errors (SE), p-values, partial eta<sup>2</sup>, and Cohen's d. BEEPVO2M. GoF statistics M:  $p_{\text{age}}=0,29$ ,  $p_{\text{year}}=0,72$ ,  $p_{\text{fixed}}=0,48$ ,  $p_{\text{random}}=0,77$ ; F:  $p_{\text{age}}=0,38$ ,  $p_{\text{year}}=0,91$ ,  $p_{\text{fixed}}=0,19$ ,  $p_{\text{random}}=0,93$ .  $AIC_{\text{males}}=206$ ,  $AIC_{\text{females}}=126$ ;  $BIC_{\text{males}}=258$ ,  $BIC_{\text{females}}=173$ .  $N_{\text{males}}=198$ ,  $n_{\text{males}}=391$ ,  $N_{\text{females}}=140$ ,  $n_{\text{females}}=277$ .

|   | Variable         | Estimate | SE   | p-value | pEta <sup>2</sup> | d     |
|---|------------------|----------|------|---------|-------------------|-------|
| M | (Intercept)      | 6,48     | 0,08 | <0,001  | 0,97              | 11,44 |
|   | Age1             | 0,07     | 0,15 | 0,671   | 0,00              | 0,06  |
|   | Age2             | 1,06     | 0,14 | <0,001  | 0,23              | 1,09  |
|   | Age3             | 0,67     | 0,17 | 0,000   | 0,08              | 0,57  |
|   | Period2019vs2020 | 0,04     | 0,05 | 0,376   | 0,00              | 0,13  |
|   | Period2021vs2020 | -0,07    | 0,05 | 0,206   | 0,01              | 0,19  |
|   | year_diference1  | 0,06     | 0,06 | 0,320   | 0,01              | 0,15  |
|   | year_diference2  | 0,16     | 0,08 | 0,046   | 0,02              | 0,29  |
|   | year_diference3  | -0,04    | 0,05 | 0,409   | 0,00              | 0,12  |
| F | (Intercept)      | 6,19     | 0,09 | <0,001  | 0,97              | 12,26 |
|   | Age1             | 0,66     | 0,15 | <0,001  | 0,13              | 0,78  |
|   | Age2             | 0,68     | 0,13 | <0,001  | 0,17              | 0,91  |
|   | Age3             | 0,45     | 0,15 | 0,002   | 0,07              | 0,55  |
|   | Period2019vs2020 | 0,03     | 0,07 | 0,698   | 0,00              | 0,07  |
|   | Period2021vs2020 | -0,03    | 0,07 | 0,698   | 0,00              | 0,07  |
|   | year_diference1  | -0,14    | 0,06 | 0,031   | 0,04              | 0,38  |
|   | year_diference2  | -0,02    | 0,09 | 0,870   | 0,00              | 0,03  |
|   | year_diference3  | -0,01    | 0,05 | 0,812   | 0,00              | 0,04  |



Supplementary Table S9: Estimated coefficients, standard errors (SE), p-values, partial eta<sup>2</sup>, and Cohen's d. BMUSC. GoF statistics M:  $p_{\text{age}}=0,53$ ,  $p_{\text{year}}=0,14$ ,  $p_{\text{fixed}}=0,33$ ,  $p_{\text{random}}=0,06$ ; F:  $p_{\text{age}}=0,24$ ,  $p_{\text{year}}=0,93$ ,  $p_{\text{fixed}}=0,22$ ,  $p_{\text{random}}=0,02$ .  $AIC_{\text{males}}=136$ ,  $AIC_{\text{females}}=29$ ;  $BIC_{\text{males}}=187$ ,  $BIC_{\text{females}}=86$ .  $N_{\text{males}}=199$ ,  $n_{\text{males}}=395$ ,  $N_{\text{females}}=141$ ,  $n_{\text{females}}=277$ .

|   | Variable         | Estimate | SE   | p-value | pEta <sup>2</sup> | d    |
|---|------------------|----------|------|---------|-------------------|------|
| M | (Intercept)      | 3,97     | 0,06 | <0,001  | 0,95              | 8,78 |
|   | Age1             | 0,14     | 0,12 | 0,247   | 0,01              | 0,17 |
|   | Age2             | 2,23     | 0,12 | <0,001  | 0,65              | 2,73 |
|   | Age3             | 2,24     | 0,15 | <0,001  | 0,53              | 2,13 |
|   | Period2019vs2020 | 0,11     | 0,04 | 0,004   | 0,04              | 0,42 |
|   | Period2021vs2020 | 0,05     | 0,04 | 0,252   | 0,01              | 0,17 |
|   | year_diference1  | -0,07    | 0,04 | 0,108   | 0,01              | 0,24 |
|   | year_diference2  | -0,07    | 0,07 | 0,317   | 0,01              | 0,15 |
|   | year_diference3  | 0,12     | 0,04 | 0,004   | 0,04              | 0,43 |
| F | (Intercept)      | 3,80     | 0,07 | <0,001  | 0,95              | 9,21 |
|   | Age1             | 0,24     | 0,09 | 0,007   | 0,06              | 0,49 |
|   | Age2             | 0,32     | 0,07 | <0,001  | 0,13              | 0,78 |
|   | Age3             | 1,06     | 0,07 | <0,001  | 0,62              | 2,58 |
|   | Age4             | 1,39     | 0,09 | <0,001  | 0,63              | 2,63 |
|   | Age5             | 1,63     | 0,11 | <0,001  | 0,63              | 2,59 |
|   | Age6             | 1,48     | 0,12 | <0,001  | 0,55              | 2,22 |
|   | Period2019vs2020 | 0,01     | 0,05 | 0,854   | 0,00              | 0,03 |
|   | Period2021vs2020 | 0,08     | 0,05 | 0,083   | 0,02              | 0,31 |
|   | year_diference1  | -0,01    | 0,05 | 0,834   | 0,00              | 0,04 |
|   | year_diference2  | -0,04    | 0,07 | 0,606   | 0,00              | 0,09 |
|   | year_diference3  | 0,01     | 0,04 | 0,889   | 0,00              | 0,02 |

Supplementary Table S10: Estimated coefficients, standard errors (SE), p-values, partial eta<sup>2</sup>, and Cohen's d. SJ. GoF statistics M: p<sub>age</sub>=0,18, p<sub>year</sub>=0,27, p<sub>fixed</sub>=0,95, p<sub>random</sub>=0,38; F: p<sub>age</sub>=0,27, p<sub>year</sub>=0,98, p<sub>fixed</sub>=0,87, p<sub>random</sub>=0,16. AIC<sub>males</sub>=262, AIC<sub>females</sub>=145; BIC<sub>males</sub>=313, BIC<sub>females</sub>=192. N<sub>males</sub>=198, n<sub>males</sub>=386, N<sub>females</sub>=140, n<sub>females</sub>=275.

|   | Variable         | Estimate | SE   | p-value | pEta <sup>2</sup> | d    |
|---|------------------|----------|------|---------|-------------------|------|
| M | (Intercept)      | 4,94     | 0,09 | <0,001  | 0,94              | 7,65 |
|   | Age1             | -0,21    | 0,17 | 0,230   | 0,01              | 0,18 |
|   | Age2             | 0,74     | 0,16 | <0,001  | 0,11              | 0,70 |
|   | Age3             | 1,18     | 0,19 | <0,001  | 0,18              | 0,95 |
|   | Period2019vs2020 | -0,10    | 0,06 | 0,089   | 0,02              | 0,25 |
|   | Period2021vs2020 | 0,07     | 0,06 | 0,281   | 0,01              | 0,16 |
|   | year_diference1  | -0,04    | 0,06 | 0,553   | 0,00              | 0,09 |
|   | year_diference2  | -0,24    | 0,09 | 0,008   | 0,04              | 0,40 |
|   | year_diference3  | -0,12    | 0,05 | 0,024   | 0,03              | 0,34 |
| F | (Intercept)      | 4,75     | 0,09 | <0,001  | 0,95              | 8,84 |
|   | Age1             | 0,30     | 0,16 | 0,070   | 0,03              | 0,32 |
|   | Age2             | 0,41     | 0,14 | 0,005   | 0,06              | 0,50 |
|   | Age3             | 0,49     | 0,17 | 0,005   | 0,06              | 0,51 |
|   | Period2019vs2020 | 0,00     | 0,07 | 0,975   | 0,00              | 0,01 |
|   | Period2021vs2020 | 0,13     | 0,07 | 0,051   | 0,03              | 0,35 |
|   | year_diference1  | -0,19    | 0,07 | 0,005   | 0,06              | 0,51 |
|   | year_diference2  | -0,14    | 0,10 | 0,165   | 0,02              | 0,25 |
|   | year_diference3  | -0,17    | 0,05 | 0,002   | 0,08              | 0,58 |

Supplementary Table S11: Estimated coefficients, standard errors (SE), p-values, partial eta<sup>2</sup>, and Cohen's d. BFAT. GoF statistics M: p<sub>age</sub>=0,19, p<sub>year</sub>=0,28, p<sub>fixed</sub>=0,89, p<sub>random</sub>=0,37; F: p<sub>age</sub>=0,17, p<sub>year</sub>=0,92, p<sub>fixed</sub>=0,96, p<sub>random</sub>=0,07. AIC<sub>males</sub>=544, AIC<sub>females</sub>=339; BIC<sub>males</sub>=595, BIC<sub>females</sub>=385. N<sub>males</sub>=199, n<sub>males</sub>=395, N<sub>females</sub>=141, n<sub>females</sub>=277.

|   | Variable         | Estimate | SE   | p-value | pEta <sup>2</sup> | d    |
|---|------------------|----------|------|---------|-------------------|------|
| M | (Intercept)      | 2,40     | 0,13 | <0,001  | 0,63              | 2,63 |
|   | Age1             | 0,51     | 0,25 | 0,038   | 0,02              | 0,31 |
|   | Age2             | -0,13    | 0,22 | 0,546   | 0,00              | 0,09 |
|   | Age3             | 0,65     | 0,26 | 0,014   | 0,03              | 0,36 |
|   | Period2019vs2020 | -0,34    | 0,08 | <0,001  | 0,10              | 0,66 |
|   | Period2021vs2020 | 0,05     | 0,08 | 0,560   | 0,00              | 0,09 |
|   | year_diference1  | 0,06     | 0,08 | 0,480   | 0,00              | 0,10 |
|   | year_diference2  | -0,28    | 0,13 | 0,029   | 0,03              | 0,32 |
|   | year_diference3  | -0,40    | 0,07 | <0,001  | 0,14              | 0,82 |
| F | (Intercept)      | 2,21     | 0,13 | <0,001  | 0,67              | 2,84 |
|   | Age1             | 0,02     | 0,23 | 0,928   | 0,00              | 0,02 |
|   | Age2             | 1,21     | 0,20 | <0,001  | 0,23              | 1,08 |
|   | Age3             | 1,48     | 0,22 | <0,001  | 0,26              | 1,17 |
|   | Period2019vs2020 | -0,05    | 0,10 | 0,628   | 0,00              | 0,09 |
|   | Period2021vs2020 | -0,03    | 0,10 | 0,770   | 0,00              | 0,05 |
|   | year_diference1  | -0,01    | 0,10 | 0,901   | 0,00              | 0,02 |
|   | year_diference2  | 0,19     | 0,14 | 0,188   | 0,01              | 0,23 |
|   | year_diference3  | -0,12    | 0,08 | 0,108   | 0,02              | 0,29 |
